# Supplementary material for: Purification and characterization of detergent stable alkaline lipase from Bacillus safensis TKW3 isolated from Tso Kar brackish water lake
Source: PeerJ journal article supplement (doi:10.7717/peerj.18921), 2025-02-19
Supplement: new_supp_Figure_1.pdf [file new_supp_Figure_1.pdf]

# Figure 1

Standard curve of pN

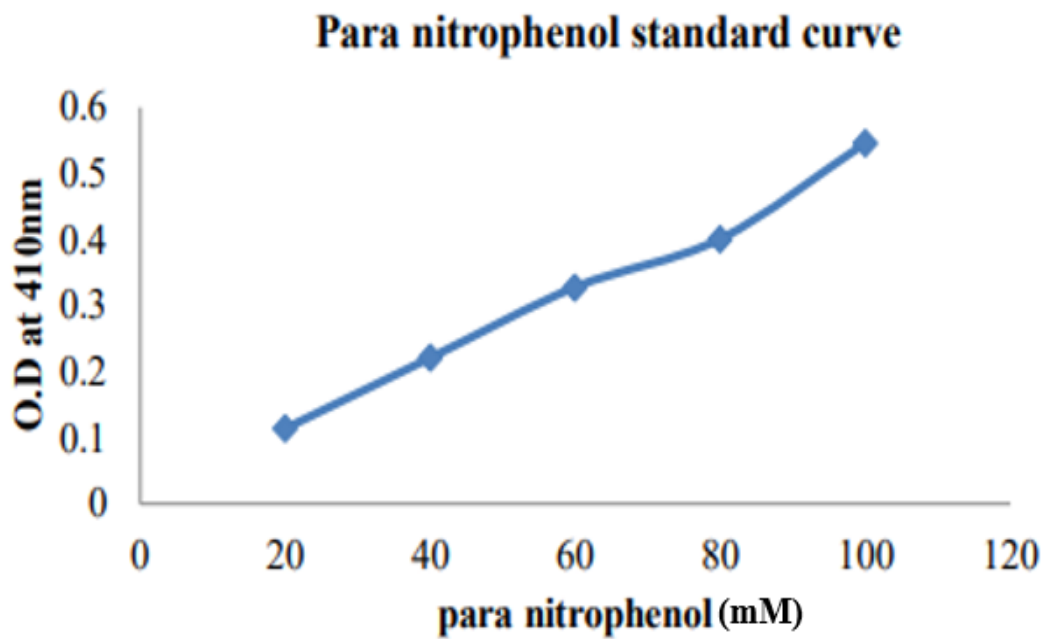

Standard curve of different concentrations of pNP at 410 nm
