# Supplementary material for: Purification and characterization of detergent stable alkaline lipase from Bacillus safensis TKW3 isolated from Tso Kar brackish water lake
Source: PeerJ journal article supplement (doi:10.7717/peerj.18921), 2025-02-19
Supplement: New_supp_Figure_2.pdf [file New_supp_Figure_2.pdf]

## Figure 2

Phylogenetic tree of TKW3 strain.

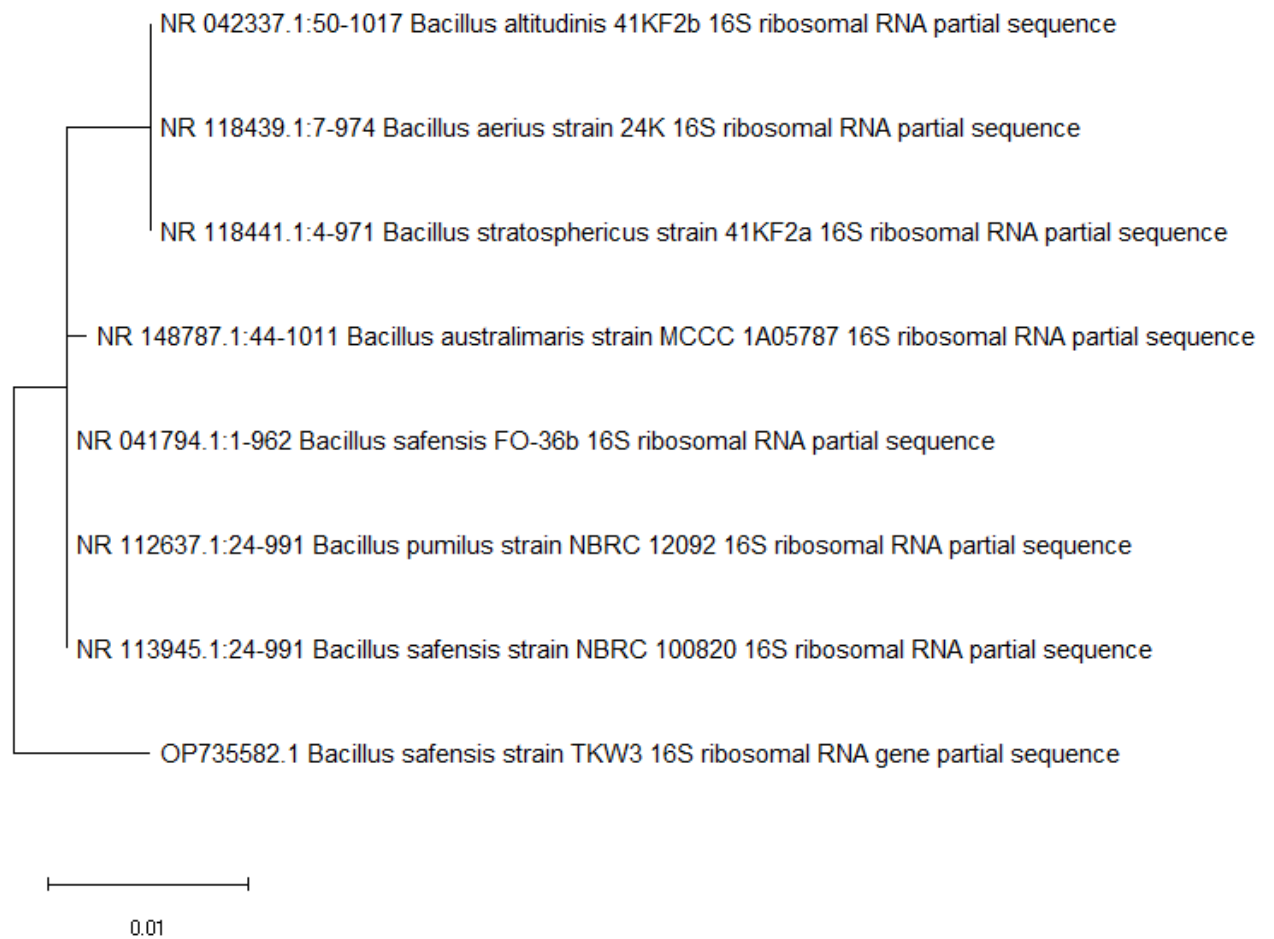

Phylogenetic tree of TKW3 strain. The phylogenetic tree was constructed using the MEGA 4.1 program
