# Supplementary material for: Purification and characterization of detergent stable alkaline lipase from Bacillus safensis TKW3 isolated from Tso Kar brackish water lake
Source: PeerJ journal article supplement (doi:10.7717/peerj.18921), 2025-02-19

## Figure 3

Secondary screening of TKW3 strain on Tributyrin substrate plate to check the localization of lipase enzyme. TKW3 showed intracellular enzyme activity on Agar plates supplemented with Tributyrin as substrate.

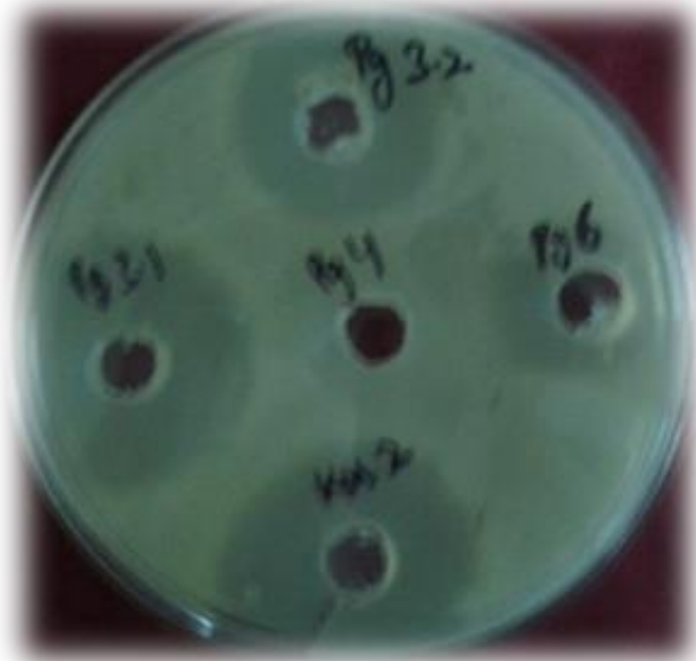

Supplement: New_supp_Figure_3.pdf [file New_supp_Figure_3.pdf]
